# Supplementary material
Source: PubMed Central journal article supplement (PMC3099663)
Supplement: supp_M110.200022_jbc.M110.200022-1.pdf [file supp_M110.200022_jbc.M110.200022-1.pdf]

## Supplement Figure

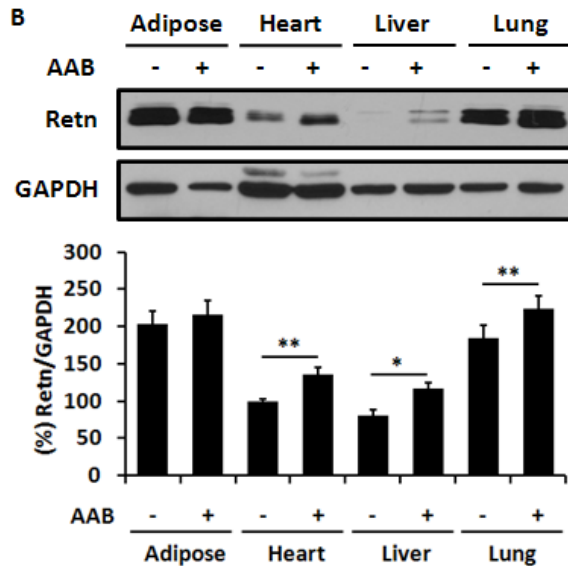

**Supplement figure.** Resistin expression in different tissues from aortic banded hypertrophic hearts. Shown is a representative western blot and expression quantification for resistin isolated from adipose tissue (Adipose), left ventricles (Heart), liver, or lung following AAB. Apart from the adipose tissue, AAB appears to increase resistin expression not only in the heart but also in the liver and lung tissues. The lung is known to contain high levels of resistin, as we already showed before (ref. 24). GAPDH is shown to verify protein loading. \* $p < 0.05$ ; \*\* $p < 0.01$ .
